# Supplementary material for: A comparative analysis of pollinator type and pollen ornamentation in the Araceae and the Arecaceae, two unrelated families of the monocots
Source: PubMed Central journal article supplement (PMC2734846; doi:10.1186/1756-0500-2-145), 2009-07-22
Supplement: 1756-0500-2-145-S1.pdf [file 1756-0500-2-145-S1.pdf]

**Additional file 1. Studies published about relationship between the ornamentation of pollen grains and others characters in angiosperms.**

| Taxa             | Reference                                            | Data type                                                                             |
|------------------|------------------------------------------------------|---------------------------------------------------------------------------------------|
| Angiosperms      | Whitehead [1]                                        | Relation between wind-pollination and smooth pollen grains                            |
| Polemoniaceae    | Taylor and Levin [2]                                 | No apparent association between pollination mechanism and pollen sculpturing          |
| Angiosperms      | Heslop-Harrison [3]                                  | Relation between exine and pollenkitt                                                 |
| Angiosperms      | Hesse [4]                                            | Relation between exine sculpturing, pollenkitt and pollination syndromes              |
| Papilionoideae   | Ferguson and Skvarla [5]                             | Correlation between pollen morphology and pollination mechanisms                      |
| Angiosperms      | Zavada [6]                                           | Association between exine sculpturing and self-incompatibility mechanisms             |
| Araceae          | Grayum [7]; Grayum [8]                               | Correlation between exine ornamentation and pollination type                          |
| <i>Bauhinia</i>  | Ferguson and Pearce [9]                              | Correlation between exine ornamentation and pollination                               |
| Angiosperms      | Gibbs and Ferguson [10]                              | No apparent association between exine sculpturing and self-incompatibility mechanisms |
| Cabombaceae      | Osborn <i>et al.</i> [11]                            | Relation between exine sculpturing, pollenkitt and pollination                        |
| Callitrichaceae  | Osborn and Philbrick [12]; Osborn <i>et al.</i> [13] | Correlation between hydrophily and smooth pollen grains                               |
| Angiosperms      | Linder [14]                                          | Relation between smooth pollen ornamentation and wind pollination                     |
| Angiosperms      | Stroo [15]                                           | No association between bat pollinated plants and pollen morphology                    |
| Hydrocharitaceae | Tanaka <i>et al.</i> [16]                            | Correlation between pollen morphology and pollination mechanisms                      |
| Orchidinae       | Lumaga <i>et al.</i> [17]                            | Relation between exine micromorphology and pollination strategies                     |

1. Whitehead DR: **Wind pollination in the angiosperms; evolutionary and environmental considerations.** *Evolution* 1969, **23**:28-35.
2. Taylor TN, Levin DA: **Pollen morphology of Polemoniaceae in relation to systematics and pollination systems: scanning electron microscopy.** *Grana* 1975, **15**:91-112.

3. Heslop-Harrison J: **The adaptative significance of the exine.** In: *The evolutionary significance of the exine.* Edited by Ferguson IK, Muller M. London: Academic press; 1976: 27-37.
4. Hesse M: **The fine structure of the exine in relation to the stickiness of angiosperm pollen.** *Review of Palaeobotany and Palynology* 1981, **35**:81-92.
5. Ferguson IK, Skvarla JJ: **Pollen morphology in relation to pollinators in Papilionoideae (Leguminosae).** *Botanical Journal of the Linnean Society* 1982, **84**:183-193.
6. Zavada MS: **The relation between pollen exine sculpturing and self-incompatibility mechanisms.** *Plant Systematics and Evolution* 1984, **147**:63-78.
7. Grayum MH: **Correlations between pollination biology and pollen morphology in the Araceae, with some implications for angiosperm evolution.** In: *Pollen and Spores: form and function.* Edited by Blackmore S, Ferguson IK. NY London: Academic Press; 1986: 313-327.
8. Grayum MH: **Comparative external pollen ultrastructure of the Araceae and putatively related taxa.** *Monographs in Systematic Botany of the Missouri Botanical Garden* 1992, **43**:1-167.
9. Ferguson IK, Pearce KJ: **Observation on the pollen morphology of the genus *Bauchinia L.* (Leguminosae: Caesalpinioideae) in the neotropics.** In: *Pollen and spores: form and function.* vol. 12. London, UK: Academic Press, ; 1986: 283-296.
10. Gibbs PE, Ferguson IK: **Correlations between pollen exine sculpturing and angiosperm self-incompatibility systems - a reply.** *Plant Systematics and Evolution* 1987, **157**:143-159.
11. Osborn JM, Taylor TN, Schneider EL: **Pollen morphology and ultrastructure of the Cabombaceae: correlations with pollination biology.** *American Journal of Botany* 1991, **78**(10):1367-1378.
12. Osborn JM, Philbrick CT: **Comparative pollen structure and pollination biology in the *Callitrichaceae.*** *Acta botanica Gallica* 1994, **141**(2):257-266.

13. Osborn JM, El-Ghazaly G, Cooper RL: **Development of the exineless pollen wall in *Callitriche truncata* (Callitrichaceae) and the evolution of underwater pollination.** *Plant Systematics and Evolution* 2001, **228**:81-87.
14. Linder HP: **Pollen morphology and wind pollination in Angiosperms.** In: *Pollen and Spores: Morphology and Biology*. Edited by Harley MM, Morton CM, Blackmore S. Kew: Royal Botanic Gardens; 2000: 73-88.
15. Stroh A: **Pollen morphological evolution in bat pollinated plants.** *Plant Systematics and Evolution* 2000, **222**:225-242.
16. Tanaka N, Uehara K, Murata J: **Correlation between pollen morphology and pollination mechanisms in the Hydrocharitaceae.** *Journal of Plant Research* 2004, **117**:265-276.
17. Lumaga MR, Cozzolino S, Kocyan A: **Exine Micromorphology of Orchidinae (Orchidoideae, Orchidaceae): Phylogenetic Constraints or Ecological Influences?** *Annals of Botany* 2006, **98**:237-244.
