# Supplementary material for: A comparative analysis of pollinator type and pollen ornamentation in the Araceae and the Arecaceae, two unrelated families of the monocots
Source: PubMed Central journal article supplement (PMC2734846; doi:10.1186/1756-0500-2-145), 2009-07-22

A.

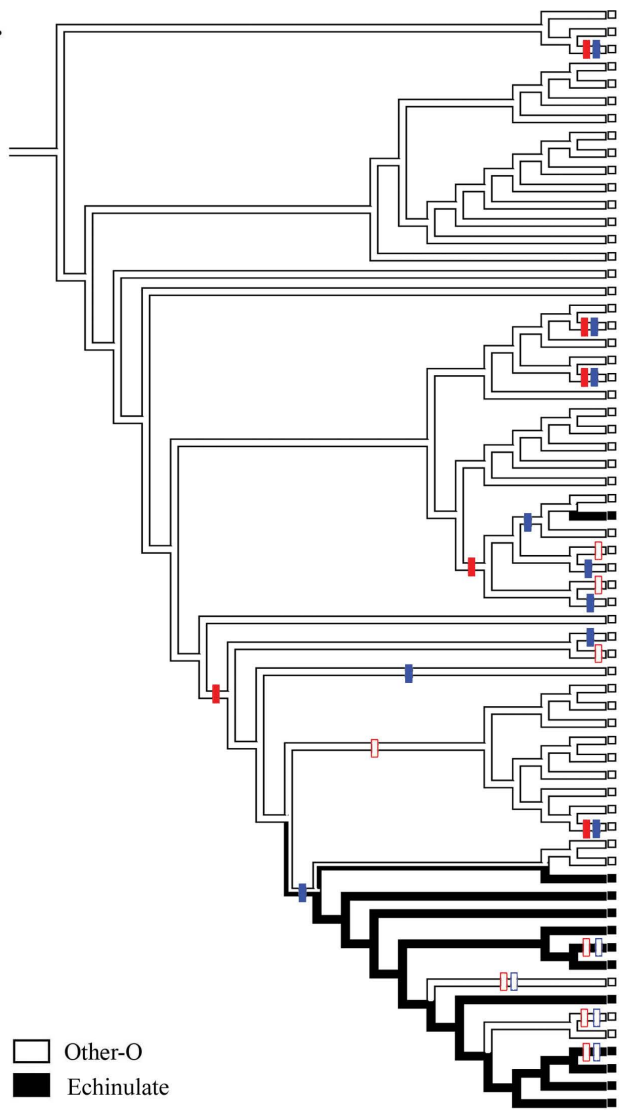

B.

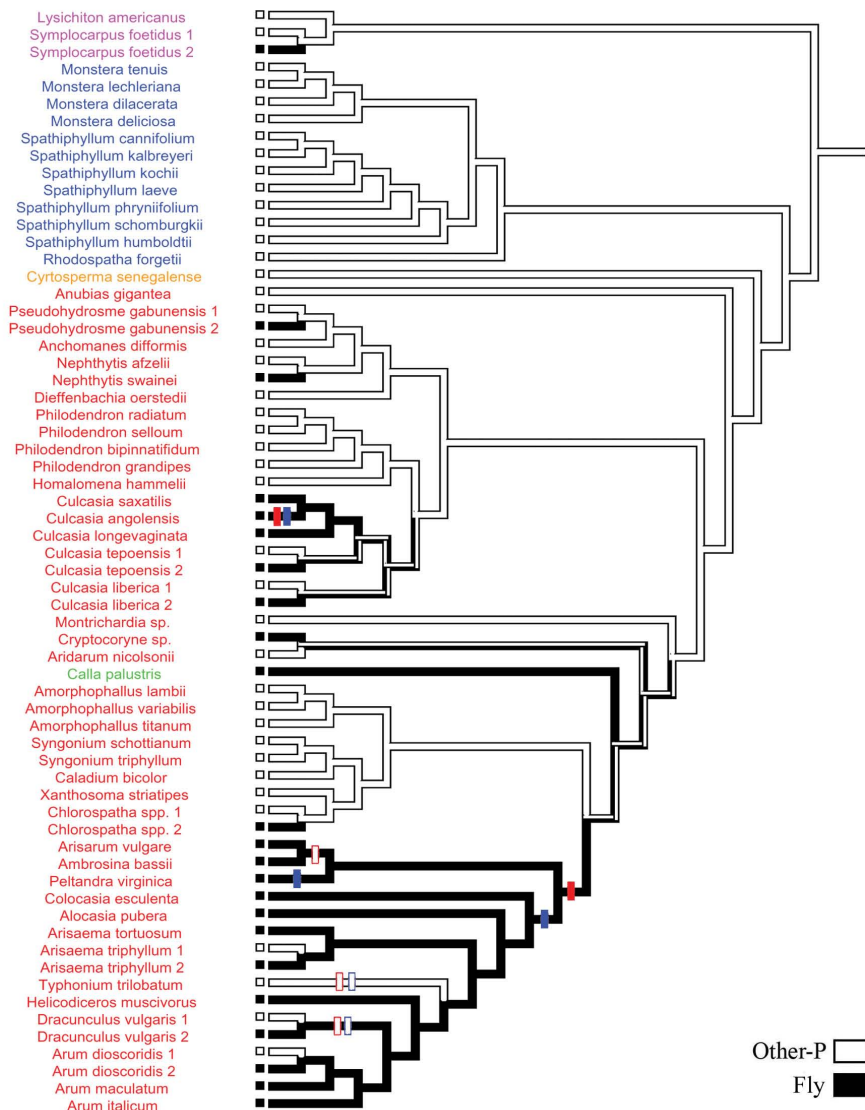

Supplement: 1756-0500-2-145-S5.pdf [file 1756-0500-2-145-S5.pdf]
