# Supplementary material for: A comparative analysis of pollinator type and pollen ornamentation in the Araceae and the Arecaceae, two unrelated families of the monocots
Source: PubMed Central journal article supplement (PMC2734846; doi:10.1186/1756-0500-2-145), 2009-07-22
Supplement: 1756-0500-2-145-S7.pdf [file 1756-0500-2-145-S7.pdf]

**Additional file 7. Comparative analyses conducted with the Concentrated-Changes Test [1] in Araceae. Pollen ornamentation was coded as ‘Echinulate’ vs. ‘Other Ornamentation’, pollination system was coded as ‘Fly’ vs ‘Other Pollination’.**

A.

|                                |   | O→B                 | O→O       | B→O       | B→B | Fisher Exact Test |    |
|--------------------------------|---|---------------------|-----------|-----------|-----|-------------------|----|
| ACCTTRAN optimization          |   |                     |           |           |     |                   |    |
| Polymorphic species removed    | 1 | Psilate/Verrucate   | <b>0</b>  | <b>0</b>  | 0   | 16                | NS |
|                                |   | Other ornamentation | <b>3</b>  | <b>61</b> | 3   | 11                |    |
|                                | 2 | Psilate/Verrucate   | <b>0</b>  | <b>0</b>  | 0   | 14                | NS |
|                                |   | Other ornamentation | <b>3</b>  | <b>61</b> | 3   | 13                |    |
| DELTRAN optimization           |   |                     |           |           |     |                   |    |
| Polymorphic species removed    | 1 | Psilate/Verrucate   | <b>1</b>  | <b>0</b>  | 0   | 15                | NS |
|                                |   | Other ornamentation | <b>4</b>  | <b>67</b> | 1   | 6                 |    |
|                                | 2 | Psilate/Verrucate   | <b>0</b>  | <b>0</b>  | 0   | 14                | NS |
|                                |   | Other ornamentation | <b>5</b>  | <b>67</b> | 1   | 7                 |    |
| ACCTTRAN optimization          |   |                     |           |           |     |                   |    |
| Polymorphic species duplicated | 1 | Psilate/Verrucate   | <b>0</b>  | <b>0</b>  | 2   | 23                | NS |
|                                |   | Other ornamentation | <b>6</b>  | <b>70</b> | 6   | 19                |    |
|                                | 2 | Psilate/Verrucate   | <b>0</b>  | <b>0</b>  | 2   | 21                | NS |
|                                |   | Other ornamentation | <b>6</b>  | <b>70</b> | 6   | 21                |    |
| DELTRAN optimization           |   |                     |           |           |     |                   |    |
| Polymorphic species duplicated | 1 | Psilate/Verrucate   | <b>1</b>  | <b>0</b>  | 2   | 22                | NS |
|                                |   | Other ornamentation | <b>9</b>  | <b>82</b> | 2   | 8                 |    |
|                                | 2 | Psilate/Verrucate   | <b>0</b>  | <b>0</b>  | 2   | 21                | NS |
|                                |   | Other ornamentation | <b>10</b> | <b>82</b> | 2   | 9                 |    |

B.

|                             |   | O→P/V             | O→O      | P/V→O     | P/V→P/V | Fisher Exact Test |          |
|-----------------------------|---|-------------------|----------|-----------|---------|-------------------|----------|
| ACCTTRAN optimization       |   |                   |          |           |         |                   |          |
| Polymorphic species removed | 1 | Beetle            | <b>2</b> | <b>13</b> | 1       | 14                | P < 0.05 |
|                             |   | Other pollination | <b>0</b> | <b>63</b> | 1       | 0                 |          |
| Polymorphic species removed | 2 | Beetle            | <b>2</b> | <b>9</b>  | 1       | 14                | P < 0.05 |
|                             |   | Other pollination | <b>0</b> | <b>67</b> | 1       | 0                 |          |
| DELTRAN optimization        |   |                   |          |           |         |                   |          |
| Polymorphic species removed | 1 | Beetle            | <b>3</b> | <b>16</b> | 0       | 11                | P < 0.05 |
|                             |   | Other pollination | <b>0</b> | <b>63</b> | 1       | 0                 |          |

|                        |   |                   |          |           |   |    |          |
|------------------------|---|-------------------|----------|-----------|---|----|----------|
|                        | 2 | Beetle            | <b>3</b> | <b>12</b> | 0 | 11 | P < 0.01 |
|                        |   | Other pollination | <b>0</b> | <b>67</b> | 1 | 0  |          |
| ACCTTRAN optimization  |   |                   |          |           |   |    |          |
|                        | 1 | Beetle            | <b>2</b> | <b>23</b> | 2 | 21 | NS       |
|                        |   | Other pollination | <b>0</b> | <b>75</b> | 1 | 2  |          |
| Polymorphic<br>species | 2 | Beetle            | <b>2</b> | <b>15</b> | 2 | 21 | P < 0.05 |
|                        |   | Other pollination | <b>0</b> | <b>83</b> | 1 | 2  |          |
| DELTRAN optimization   |   |                   |          |           |   |    |          |
| duplicated             | 1 | Beetle            | <b>3</b> | <b>26</b> | 1 | 18 | P < 0.05 |
|                        |   | Other pollination | <b>0</b> | <b>75</b> | 1 | 2  |          |
|                        | 2 | Beetle            | <b>3</b> | <b>18</b> | 1 | 18 | P < 0.01 |
|                        |   | Other pollination | <b>0</b> | <b>83</b> | 1 | 2  |          |

A - Distribution of events in the character ‘pollination type’ on branches reconstructed as having ‘Echinulate’ and ‘Other-O’ ornamentation, respectively. B - Distribution of events in the character ornamentation type on branches reconstructed as having ‘Fly’ and ‘Other-P’ pollination, respectively. O: Other-P or Other-O depending on the context; F: Fly; E: Echinulate; 1: Pollination and ornamentation type reconstructed with ACCTTRAN; 2: Pollination and ornamentation type reconstructed with DELTRAN. The Fisher exact test was computed for the columns with numbers in bold (transitions O→B and O→O for table A; O→P/V and O→O for table B).

1. Maddison WP: **A method for testing the correlated evolution of two binary characters: are gains or losses concentrated on certain branches of a phylogenetic tree?** *Evolution* 1990, **44**(3):539-557.
