# Supplementary material for: A comparative analysis of pollinator type and pollen ornamentation in the Araceae and the Arecaceae, two unrelated families of the monocots
Source: PubMed Central journal article supplement (PMC2734846; doi:10.1186/1756-0500-2-145), 2009-07-22
Supplement: 1756-0500-2-145-S10.pdf [file 1756-0500-2-145-S10.pdf]

**Additional file 10. Comparative analyses conducted with the Concentrated-Changes Test [1] in Areaceae. Pollen ornamentation was coded as ‘Echinulate’ vs. ‘Other Ornamentation’, pollination system was coded as ‘Fly’ vs ‘Other Pollination’.**

A.

|                                |   | O→B                 | O→O      | B→O       | B→B | Fisher Exact Test |    |
|--------------------------------|---|---------------------|----------|-----------|-----|-------------------|----|
| ACCTTRAN optimization          |   |                     |          |           |     |                   |    |
| Polymorphic species duplicated | 1 | Psilate/Verrucate   | <b>1</b> | <b>28</b> | 0   | 1                 | NS |
|                                |   | Other ornamentation | <b>4</b> | <b>81</b> | 0   | 3                 |    |
|                                | 2 | Psilate/Verrucate   | <b>1</b> | <b>14</b> | 0   | 1                 | NS |
|                                |   | Other ornamentation | <b>4</b> | <b>95</b> | 0   | 3                 |    |
| DELTRAN optimization           |   |                     |          |           |     |                   |    |
| Polymorphic species duplicated | 1 | Psilate/Verrucate   | <b>1</b> | <b>28</b> | 0   | 1                 | NS |
|                                |   | Other ornamentation | <b>4</b> | <b>81</b> | 0   | 3                 |    |
|                                | 2 | Psilate/Verrucate   | <b>1</b> | <b>14</b> | 0   | 1                 | NS |
|                                |   | Other ornamentation | <b>4</b> | <b>95</b> | 0   | 3                 |    |

B.

|                                |   | O→P/V             | O→O       | P/V→O     | P/V→P/V | Fisher Exact Test |    |
|--------------------------------|---|-------------------|-----------|-----------|---------|-------------------|----|
| ACCTTRAN optimization          |   |                   |           |           |         |                   |    |
| Polymorphic species duplicated | 1 | Beetle            | <b>1</b>  | <b>7</b>  | 0       | 1                 | NS |
|                                |   | Other pollination | <b>3</b>  | <b>73</b> | 8       | 25                |    |
|                                | 2 | Beetle            | <b>1</b>  | <b>7</b>  | 0       | 1                 | NS |
|                                |   | Other pollination | <b>3</b>  | <b>73</b> | 8       | 25                |    |
| DELTRAN optimization           |   |                   |           |           |         |                   |    |
| Polymorphic species duplicated | 1 | Beetle            | <b>2</b>  | <b>7</b>  | 0       | 0                 | NS |
|                                |   | Other pollination | <b>10</b> | <b>95</b> | 0       | 4                 |    |
|                                | 2 | Beetle            | <b>2</b>  | <b>7</b>  | 0       | 0                 | NS |
|                                |   | Other pollination | <b>10</b> | <b>95</b> | 0       | 4                 |    |

A - Distribution of events in the character ‘pollination type’ on branches reconstructed as having ‘Echinulate’ and ‘Other-O’ ornamentation, respectively. B - Distribution of events in the character ornamentation type on branches reconstructed as having ‘Fly’ and ‘Other-P’ pollination, respectively. O: Other-P or Other-O depending on the context; F: Fly; E: Echinulate; 1: Pollination and ornamentation type reconstructed with ACCTTRAN; 2: Pollination and ornamentation type reconstructed with DELTRAN. The Fisher exact test was computed for the columns with numbers in bold (transitions O→B and O→O for table A; O→P/V and O→O for table B).

1. Maddison WP: **A method for testing the correlated evolution of two binary characters: are gains or losses concentrated on certain branches of a phylogenetic tree?** *Evolution* 1990, **44**(3):539-557.
